# Supplementary material
Source: PubMed Central journal article supplement (PMC4877033)
Supplement: NIHMS785067-supplement-SI_file.pdf [file NIHMS785067-supplement-SI_file.pdf]

# **Binuclear Cu<sub>A</sub> Formation in Biosynthetic Models of Cu<sub>A</sub> in Azurin Proceeds via a Novel Cu(Cys)<sub>2</sub>His Mononuclear Copper Intermediate**

Saumen Chakraborty,<sup>†,§</sup> Michael J. Polen,<sup>†,±</sup>  
Kelly N. Chacón,<sup>‡</sup> Tiffany D. Wilson,<sup>†</sup> Yang  
Yu,<sup>†,≠</sup> Julian Reed,<sup>†</sup> Mark J. Nilges,<sup>†</sup> Ninian  
J. Blackburn,<sup>‡,\*</sup> Yi Lu<sup>†,\*</sup>

<sup>†</sup> Department of Chemistry, University of Illinois at  
Urbana-Champaign, Urbana, IL 61801, USA

<sup>‡</sup> Institute of Environmental Health, Oregon Health &  
Sciences University, Portland, OR 97239, USA

Email: [yi-lu@illinois.edu](mailto:yi-lu@illinois.edu); [blackbni@ohsu.edu](mailto:blackbni@ohsu.edu)

**Table S1:** Rates derived from analysis of the O<sub>2</sub>-rich stopped-flow data of all Glu114XCu<sub>A</sub>Az variants.

| <b>Cu<sub>A</sub> Variant</b> | <b>Kinetic Model</b>                                                          | <b>Rate Constants<br/>O<sub>2</sub>-rich</b>                                                                                            |
|-------------------------------|-------------------------------------------------------------------------------|-----------------------------------------------------------------------------------------------------------------------------------------|
| Glu114GlyCu <sub>A</sub> Az   |                                                                               | $k_1 = 10.75 \pm 0.37 \text{ s}^{-1}$<br>$k_2 = 2.20 \pm 0.03 \text{ s}^{-1}$<br>$k_3 = (1.13 \pm 0.03) \times 10^{-3} \text{ s}^{-1}$  |
| Glu114AlaCu <sub>A</sub> Az   | CuSO <sub>4</sub> → T2 Cu<br>T2 Cu → I <sub>x</sub><br>I <sub>x</sub> → T1 Cu | $k_1 = 19.72 \pm 1.27 \text{ s}^{-1}$<br>$k_2 = 0.47 \pm 0.03 \text{ s}^{-1}$<br>$k_3 = (2.18 \pm 0.05) \times 10^{-3} \text{ s}^{-1}$  |
| Glu114LeuCu <sub>A</sub> Az   |                                                                               | $k_1 = 11.61 \pm 0.75 \text{ s}^{-1}$<br>$k_2 = 0.35 \pm 0.005 \text{ s}^{-1}$<br>$k_3 = (2.13 \pm 0.04) \times 10^{-3} \text{ s}^{-1}$ |
| Glu114GlnCu <sub>A</sub> Az   |                                                                               | $k_1 = 6.77 \pm 0.41 \text{ s}^{-1}$<br>$k_2 = 0.33 \pm 0.01 \text{ s}^{-1}$<br>$k_3 = (3.41 \pm 0.06) \times 10^{-3} \text{ s}^{-1}$   |

**Table S2:** Parameters extracted from fitting of the EPR data of Glu114XCu<sub>A</sub>Az variants obtained at various time points after mixing apo proteins with 0.4 eq. CuSO<sub>4</sub>. Parameters corresponding to the earliest time points are shown in Table 2.

| Cu <sub>A</sub> Variant     | Parameters                                                |                        |                        |       |       |                 | Populations (%) |                        |                        |    |     |                 |
|-----------------------------|-----------------------------------------------------------|------------------------|------------------------|-------|-------|-----------------|-----------------|------------------------|------------------------|----|-----|-----------------|
|                             |                                                           | <i>I</i> <sub>x1</sub> | <i>I</i> <sub>x2</sub> | T1    | T2    | Cu <sub>A</sub> | Time<br>(min)   | <i>I</i> <sub>x1</sub> | <i>I</i> <sub>x2</sub> | T1 | T2  | Cu <sub>A</sub> |
| Glu114GlyCu <sub>A</sub> Az | <i>g</i> <sub>x</sub>                                     | 2.034                  | 2.027                  | 1.989 | N/A   | 2.010           | 0.83            | 38                     | 46                     | 0  | N/A | 16              |
|                             | <i>g</i> <sub>y</sub>                                     | 2.036                  | 2.020                  | 2.048 |       | 2.026           | 35              | 35                     | 44                     | 12 |     | 9               |
|                             | <i>g</i> <sub>z</sub>                                     | 2.152                  | 2.185                  | 2.242 |       | 2.169           | 135             | 30                     | 31                     | 29 |     | 10              |
|                             | <i>A</i> <sub>x</sub>  x10 <sup>-4</sup> cm <sup>-1</sup> | 10                     | 23                     | 22    |       | 21,19           | 285             | 17                     | 16                     | 45 |     | 22              |
|                             | <i>A</i> <sub>y</sub>  x10 <sup>-4</sup> cm <sup>-1</sup> | 6                      | 22                     | 6     |       | 29,4            | 430             | 7                      | 5                      | 59 |     | 29              |
|                             | <i>A</i> <sub>z</sub>  x10 <sup>-4</sup> cm <sup>-1</sup> | 101                    | 87                     | 69    |       | 63,57           | 1440            | 3                      | 3                      | 39 |     | 56              |
| Glu114AlaCu <sub>A</sub> Az | <i>g</i> <sub>x</sub>                                     | 2.036                  | 2.039                  | 2.035 | 2.043 | 2.016           | 0.83            | 41                     | 45                     | 0  | 0   | 14              |
|                             | <i>g</i> <sub>y</sub>                                     | 2.022                  | 2.022                  | 2.045 | 2.095 | 2.026           | 5               | 36                     | 40                     | 5  | 3   | 15              |
|                             | <i>g</i> <sub>z</sub>                                     | 2.163                  | 2.187                  | 2.269 | 2.255 | 2.167           | 20              | 36                     | 31                     | 10 | 7   | 15              |
|                             | <i>A</i> <sub>x</sub>  x10 <sup>-4</sup> cm <sup>-1</sup> | 7                      | 12                     | 9     | 31    | 19,23           | 60              | 20                     | 14                     | 24 | 19  | 22              |
|                             | <i>A</i> <sub>y</sub>  x10 <sup>-4</sup> cm <sup>-1</sup> | 14                     | 24                     | 6     | 37    | 30,3            | 180             | 8                      | 3                      | 33 | 25  | 31              |
|                             | <i>A</i> <sub>z</sub>  x10 <sup>-4</sup> cm <sup>-1</sup> | 100                    | 75                     | 45    | 142   | 62,57           | 270             | 7                      | 2                      | 31 | 28  | 32              |
|                             |                                                           |                        |                        |       |       | 1320            | 4               | 0                      | 29                     | 25 | 42  |                 |
| Glu114LeuCu <sub>A</sub> Az | <i>g</i> <sub>x</sub>                                     | 2.009                  | 2.005                  | 2.040 | N/A   | 2.014           | 0.75            | 55                     | 22                     | 0  | N/A | 23              |
|                             | <i>g</i> <sub>y</sub>                                     | 2.035                  | 2.032                  | 2.047 |       | 2.026           | 1               | 61                     | 28                     | 1  |     | 10              |
|                             | <i>g</i> <sub>z</sub>                                     | 2.163                  | 2.240                  | 2.259 |       | 2.168           | 5               | 54                     | 24                     | 6  |     | 15              |
|                             | <i>A</i> <sub>x</sub>  x10 <sup>-4</sup> cm <sup>-1</sup> | 14                     | 27                     | 2     |       | 15,19           | 45              | 34                     | 16                     | 38 |     | 12              |
|                             | <i>A</i> <sub>y</sub>  x10 <sup>-4</sup> cm <sup>-1</sup> | 12                     | 13                     | 27    |       | 31,6            | 210             | 3                      | 2                      | 80 |     | 14              |
|                             | <i>A</i> <sub>z</sub>  x10 <sup>-4</sup> cm <sup>-1</sup> | 73                     | 74                     | 46    |       | 61,57           |                 |                        |                        |    |     |                 |
| Glu114GlnCu <sub>A</sub> Az | <i>g</i> <sub>x</sub>                                     | 2.011                  | 1.991                  | 2.031 | N/A   | 2.018           | 0.83            | 68                     | 18                     | 3  | N/A | 10              |
|                             | <i>g</i> <sub>y</sub>                                     | 2.035                  | 2.092                  | 2.060 |       | 2.024           | 5               | 52                     | 13                     | 25 |     | 10              |
|                             | <i>g</i> <sub>z</sub>                                     | 2.151                  | 2.249                  | 2.289 |       | 2.171           | 20              | 35                     | 9                      | 33 |     | 23              |
|                             | <i>A</i> <sub>x</sub>  x10 <sup>-4</sup> cm <sup>-1</sup> | 20                     | 8                      | 1     |       | 25,23           | 55              | 17                     | 2                      | 51 |     | 30              |
|                             | <i>A</i> <sub>y</sub>  x10 <sup>-4</sup> cm <sup>-1</sup> | 14                     | 41                     | 23    |       | 31,7            | 225             | 11                     | 2                      | 47 |     | 40              |
|                             | <i>A</i> <sub>z</sub>  x10 <sup>-4</sup> cm <sup>-1</sup> | 82                     | 133                    | 38    |       | 61,55           |                 |                        |                        |    |     |                 |

**Table S3:** EPR Parameters of holo Cu<sub>A</sub> for all variants prepared by mixing apo proteins with a mixture of 0.8eq Cu(II)/0.8 eq. Cu(I), shown in Figure S3. The experimental data were simulated as two types of Cu<sub>A</sub>, one with symmetric, and another with asymmetric geometry. The parameters and relative population of the asymmetric Cu<sub>A</sub> type are shown as italics in blue.

| <b>Cu<sub>A</sub> Variant</b> | <b>Parameters</b>                                      | <b>Populations (%)</b> |               |               |
|-------------------------------|--------------------------------------------------------|------------------------|---------------|---------------|
| Glu114GlyCu <sub>A</sub> Az   | <i>g<sub>x</sub></i>                                   | 2.014                  | <i>2.003</i>  | 57, <i>43</i> |
|                               | <i>g<sub>y</sub></i>                                   | 2.019                  | <i>2.028</i>  |               |
|                               | <i>g<sub>z</sub></i>                                   | 2.167                  | <i>2.212</i>  |               |
|                               | <i> A<sub>x</sub> x10<sup>-4</sup> cm<sup>-1</sup></i> | 24, 16                 | <i>32, 13</i> |               |
|                               | <i> A<sub>y</sub> x10<sup>-4</sup> cm<sup>-1</sup></i> | 19, 6                  | <i>18, 23</i> |               |
|                               | <i> A<sub>z</sub> x10<sup>-4</sup> cm<sup>-1</sup></i> | 63, 60                 | <i>64, 18</i> |               |
| Glu114AlaCu <sub>A</sub> Az   | <i>g<sub>x</sub></i>                                   | 2.016,                 | <i>2.008</i>  | 70, <i>30</i> |
|                               | <i>g<sub>y</sub></i>                                   | 2.027,                 | <i>2.035</i>  |               |
|                               | <i>g<sub>z</sub></i>                                   | 2.168,                 | <i>2.219</i>  |               |
|                               | <i> A<sub>x</sub> x10<sup>-4</sup> cm<sup>-1</sup></i> | 19, 23,                | <i>26, 15</i> |               |
|                               | <i> A<sub>y</sub> x10<sup>-4</sup> cm<sup>-1</sup></i> | 30, 4                  | <i>18, 24</i> |               |
|                               | <i> A<sub>z</sub> x10<sup>-4</sup> cm<sup>-1</sup></i> | 61, 57                 | <i>60, 18</i> |               |
| Glu114LeuCu <sub>A</sub> Az   | <i>g<sub>x</sub></i>                                   | 2.019,                 | <i>2.013</i>  | 90, <i>10</i> |
|                               | <i>g<sub>y</sub></i>                                   | 2.024,                 | <i>2.045</i>  |               |
|                               | <i>g<sub>z</sub></i>                                   | 2.172,                 | <i>2.216</i>  |               |
|                               | <i> A<sub>x</sub> x10<sup>-4</sup> cm<sup>-1</sup></i> | 25, 23                 | <i>21, 8</i>  |               |
|                               | <i> A<sub>y</sub> x10<sup>-4</sup> cm<sup>-1</sup></i> | 31, 7                  | <i>14, 18</i> |               |
|                               | <i> A<sub>z</sub> x10<sup>-4</sup> cm<sup>-1</sup></i> | 61, 54                 | <i>65, 15</i> |               |
| Glu114GlnCu <sub>A</sub> Az   | <i>g<sub>x</sub></i>                                   | 2.015,                 | <i>2.007</i>  | 71, <i>29</i> |
|                               | <i>g<sub>y</sub></i>                                   | 2.027,                 | <i>2.034</i>  |               |
|                               | <i>g<sub>z</sub></i>                                   | 2.169,                 | <i>2.218</i>  |               |
|                               | <i> A<sub>x</sub> x10<sup>-4</sup> cm<sup>-1</sup></i> | 15,19                  | <i>26, 15</i> |               |
|                               | <i> A<sub>y</sub> x10<sup>-4</sup> cm<sup>-1</sup></i> | 30, 6                  | <i>18, 24</i> |               |
|                               | <i> A<sub>z</sub> x10<sup>-4</sup> cm<sup>-1</sup></i> | 61, 57                 | <i>60, 18</i> |               |

**Table S4:** Parameters extracted from fitting of the EXAFS data of holo Cu<sub>A</sub> samples shown in Figure S4.

| Sample/Fit                       | F    | Cu-S (Cys) |      |                     | Cu-N (His) |                    |       | Cu-Cu |      |                     | E <sub>0</sub> |
|----------------------------------|------|------------|------|---------------------|------------|--------------------|-------|-------|------|---------------------|----------------|
|                                  |      | N          | R(Å) | DW(Å <sup>2</sup> ) | N          | R(Å <sup>2</sup> ) | DW(Å) | N     | R(Å) | DW(Å <sup>2</sup> ) |                |
| <b>Glu114GlyCu<sub>A</sub>Az</b> | 0.41 | 2          | 2.22 | 0.018               | 1          | 1.92               | 0.015 | 0.8   | 2.44 | 0.005               | 0.097          |
| <b>Glu114AlaCu<sub>A</sub>Az</b> | 0.52 | 2          | 2.22 | 0.023               | 1          | 1.92               | 0.012 | 0.7   | 2.41 | 0.008               | -0.06          |
| <b>Glu114LeuCu<sub>A</sub>Az</b> | 0.49 | 2          | 2.19 | 0.02                | 1          | 1.84               | 0.021 | 0.7   | 2.44 | 0.012               | 3.95           |
| <b>Glu114GlnCu<sub>A</sub>Az</b> | 0.55 | 2          | 2.16 | 0.014               | 1          | 1.87               | 0.015 | 0.6   | 2.40 | 0.011               | 7.92           |

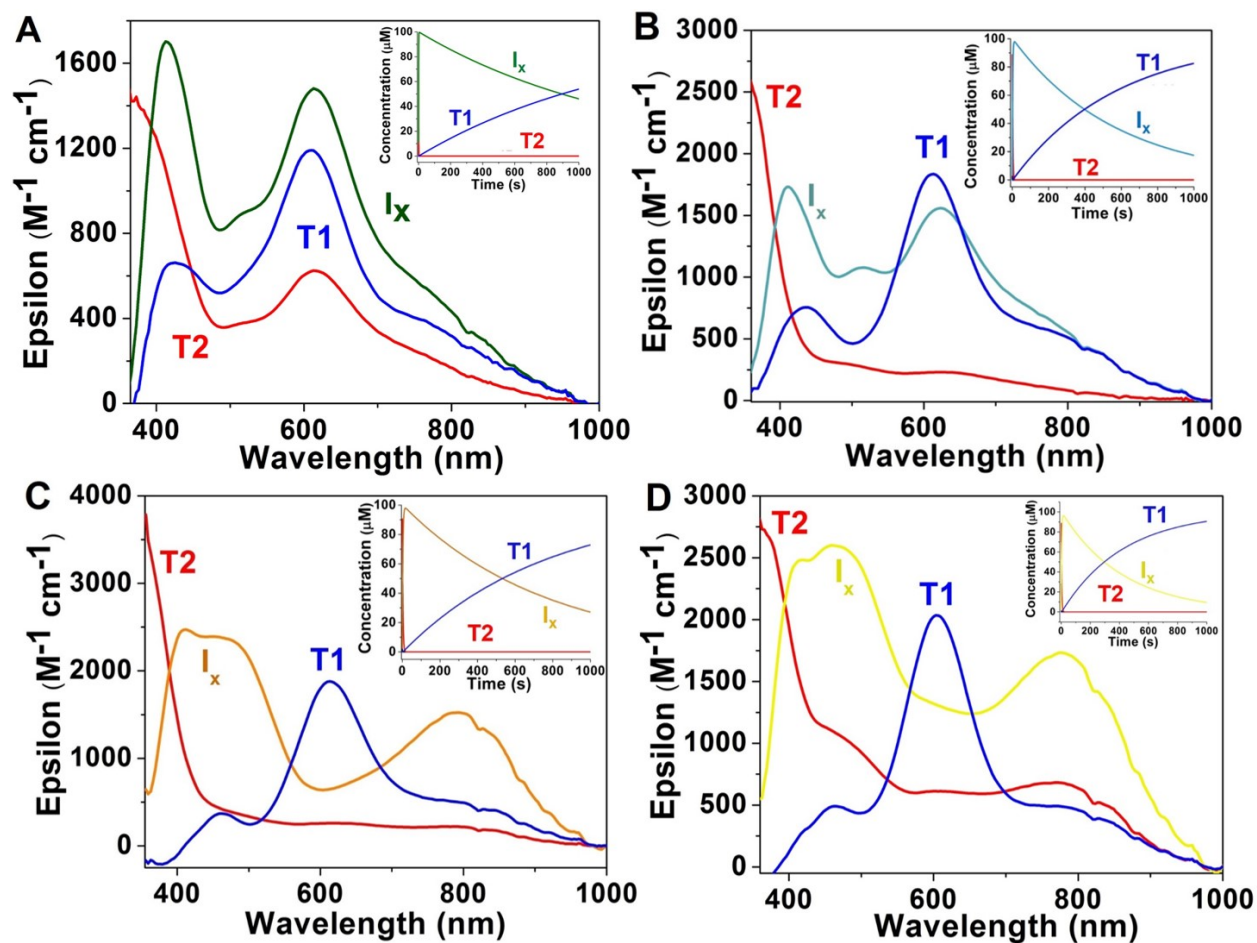

**Figure S1.** Specfit-derived spectra of different intermediates obtained from global analysis of the stopped-flow data of Glu114GlyCu<sub>A</sub>Az (**A**), Glu114AlaCu<sub>A</sub>Az (**B**), Glu114LeuCu<sub>A</sub>Az (**C**), and Glu14GlnCu<sub>A</sub>Az (**D**) shown in Figure 2. Concentrations of the species as a function of time are shown as insets. As CuSO<sub>4</sub> is consumed quickly, this reactant cannot be seen in the insets.

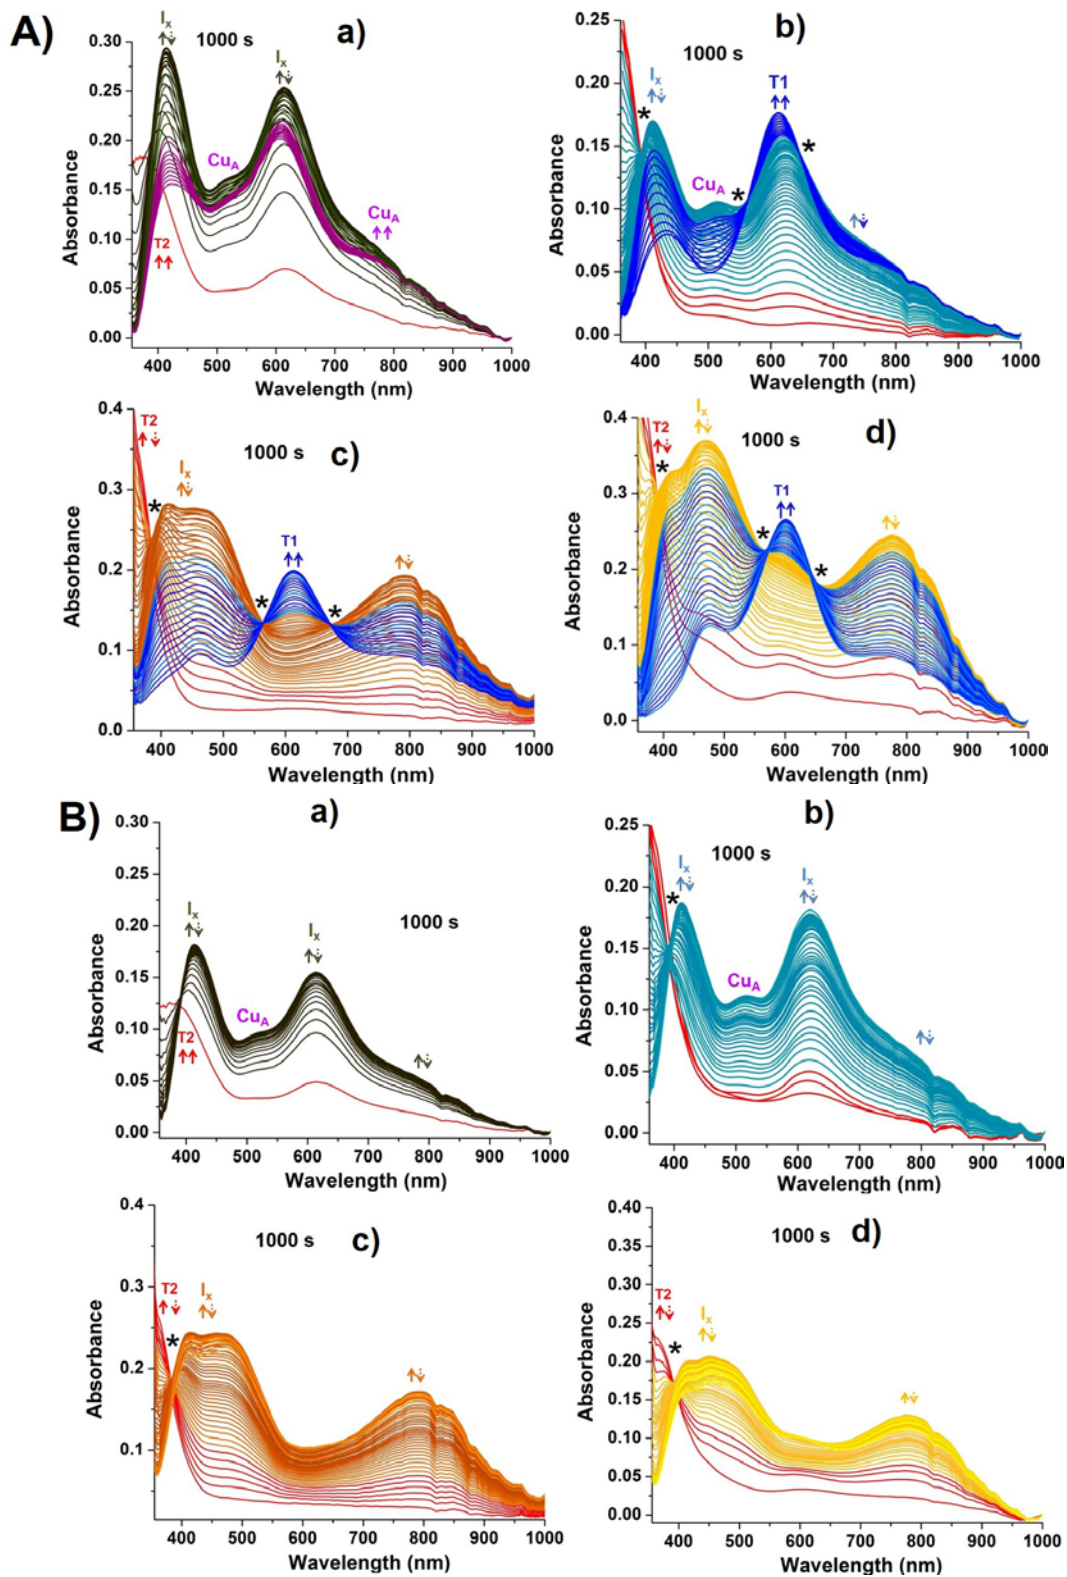

**Figure S2:** O<sub>2</sub>-rich (A) and anaerobic (B) stopped flow data for all variants at pH 7. a) Glu114GlyCu<sub>A</sub>Az, b) Glu114AlaCu<sub>A</sub>Az, c) Glu114LeuCu<sub>A</sub>Az, d) Glu114GlnCu<sub>A</sub>Az.

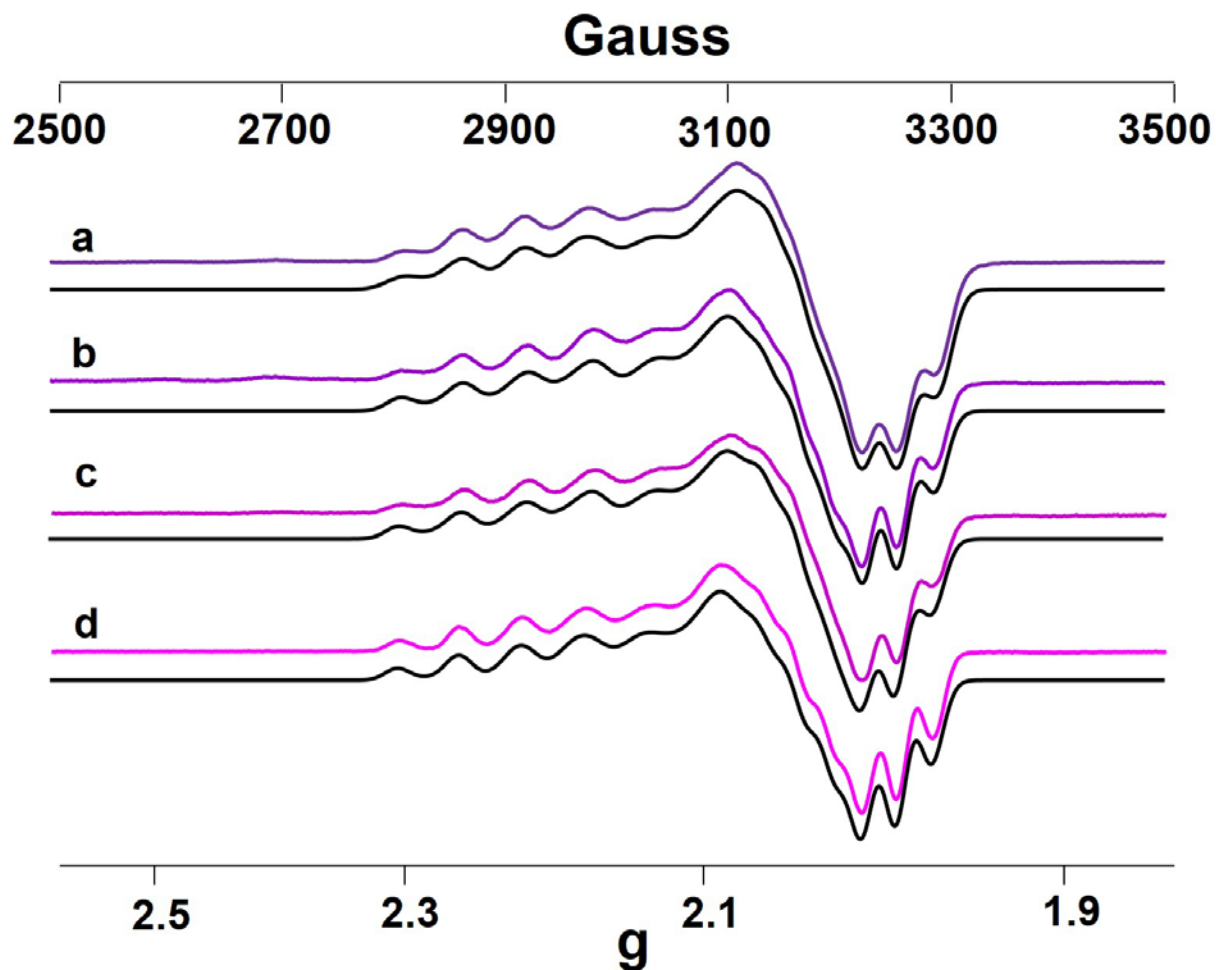

**Figure. S3.** EPR spectra of holo a) Glu114GlyCu<sub>A</sub>Az, b) Glu114AlaCu<sub>A</sub>Az, c) Glu114LeuCu<sub>A</sub>Az, d) Glu114GlnCu<sub>A</sub>Az prepared by mixing apo proteins with a mixture of 0.8 eq. Cu(II) and 0.8 eq. Cu(I), recorded at pH 7. Fit to the experimental data are shown as black lines. Experimental conditions: H = 9.053 GHz, T=30 K, Modulation = 4G, Microwave power = 0.2 mW.



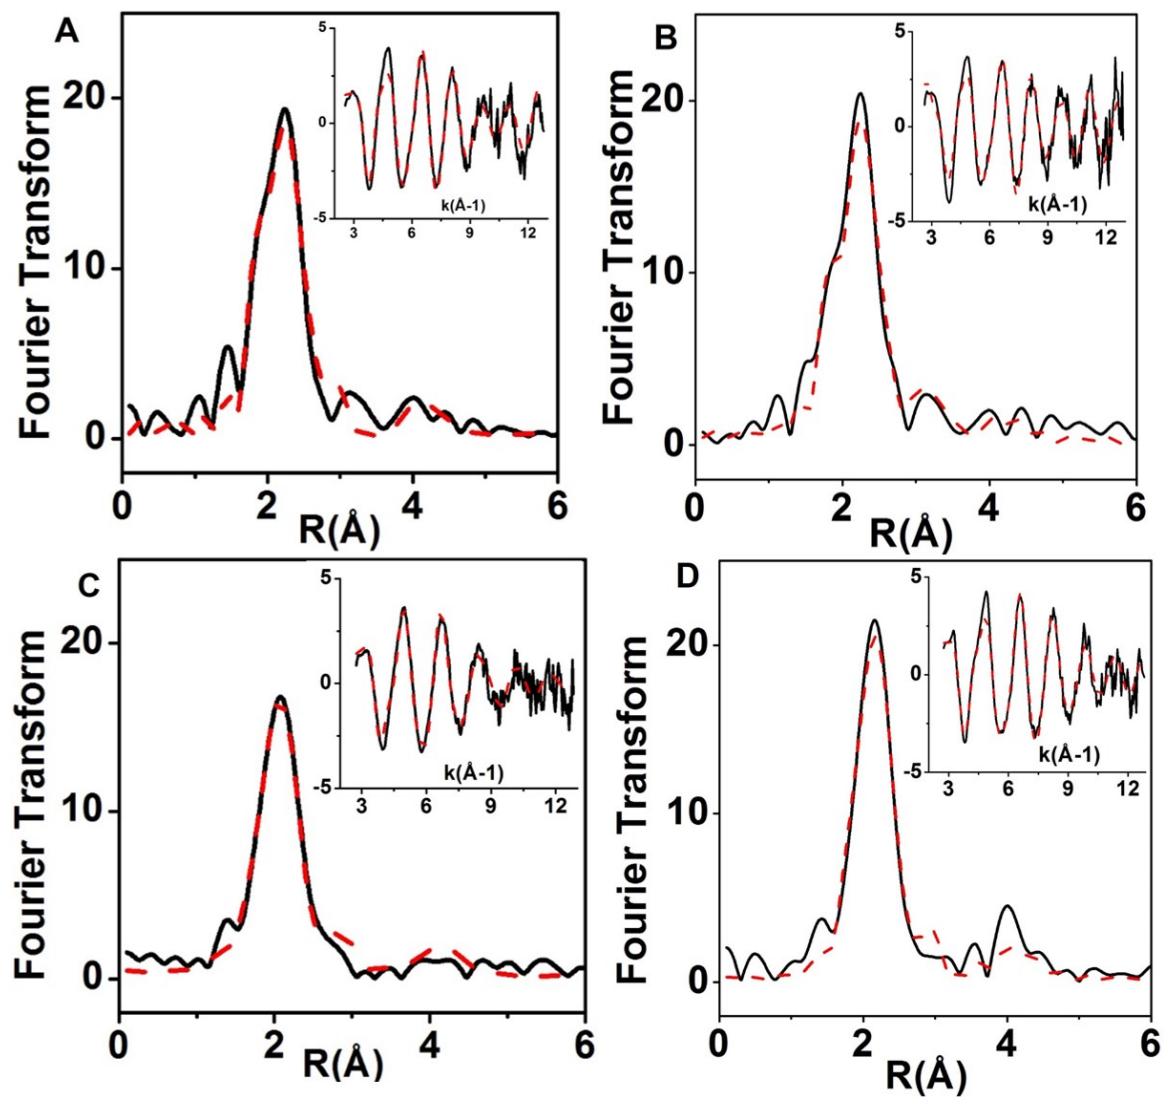

**Figure S4.** Fourier transform and EXAFS (inset) data of holo Cu<sub>A</sub> samples prepared by mixing apo Glu114GlyCu<sub>A</sub>Az (A), Glu114AlaCu<sub>A</sub>Az (B), Glu114LeuCu<sub>A</sub>Az (C), and Glu114GlnCu<sub>A</sub>Az (D) with a mixture of 0.8eq Cu(II)/0.8 eq Cu(I).

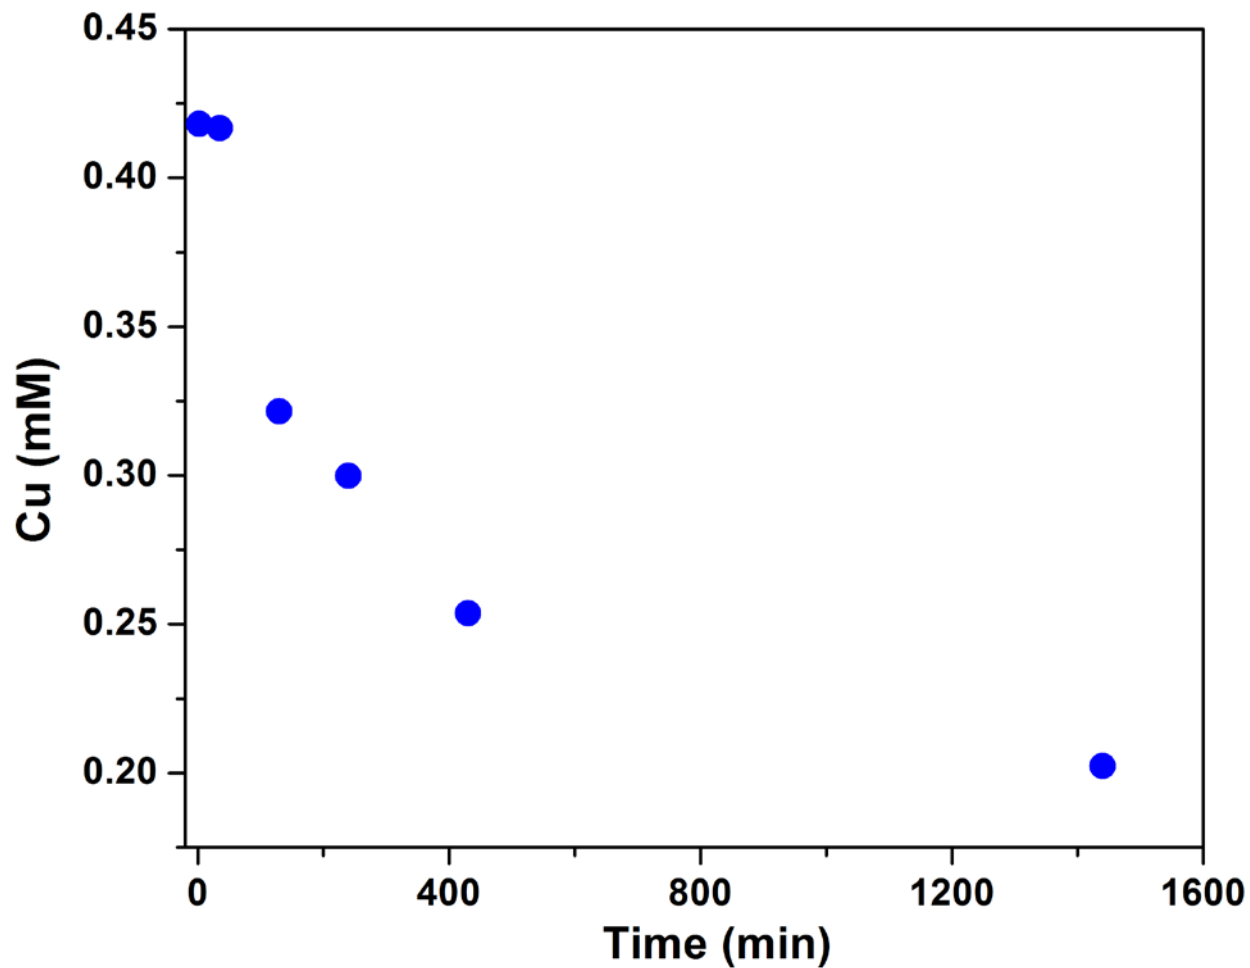

**Figure S5.** EPR quantification of Cu(II) present in Glu114GlyCu<sub>A</sub>Az I<sub>x</sub> with time. Concentration of Cu(II) is obtained from by double integration of the EPR spectra at various time points against the standard curve of CuSO<sub>4</sub>. A loss of Cu(II) concentration with time suggests that spin is being lost from the system forming EPR silent Cu(I). Experimental parameters: H = 9.053 GHz, T=30 K, Modulation = 4G, Microwave power = 0.2 mW, gain = 1600.
